# Supplementary material
Source: publisher figshare collection journal article supplement (https://frontiersin.figshare.com/ndownloader/files/12784706)

Fig S3

mouse double-positive T cells

human AML

30 iterations for background peaks

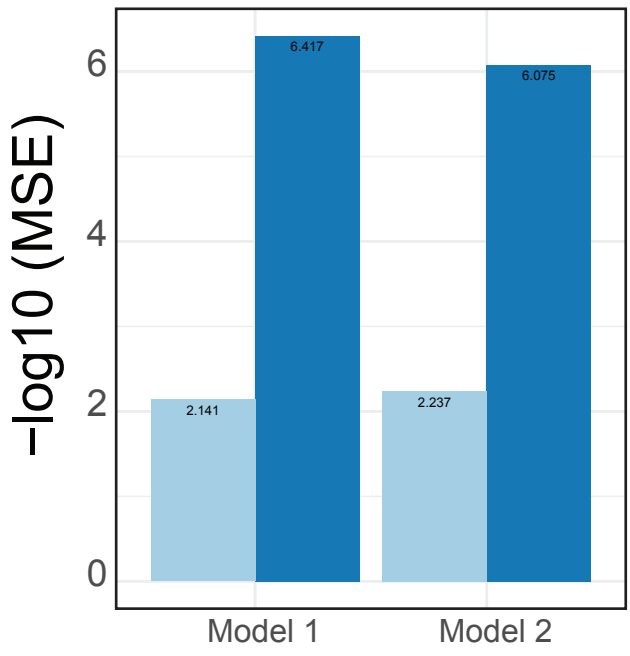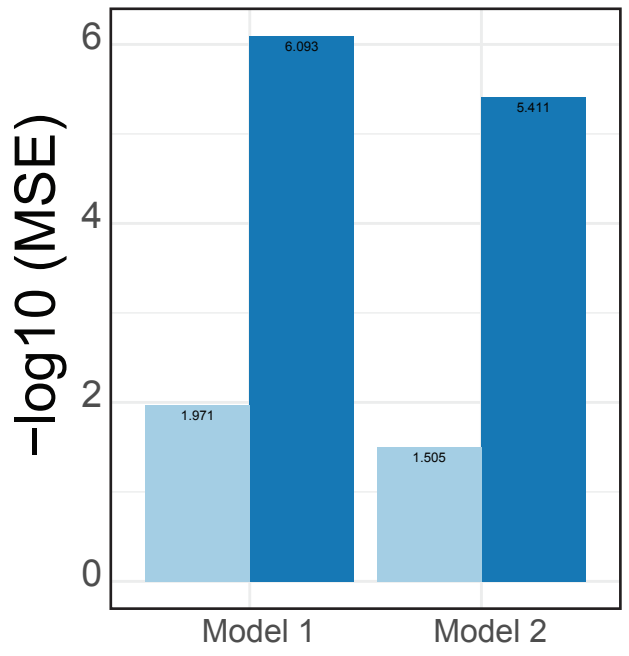

40 iterations for background peaks

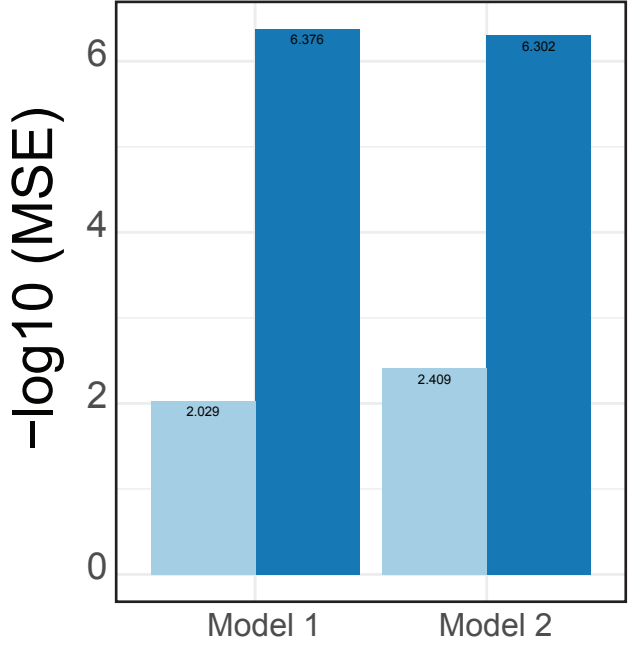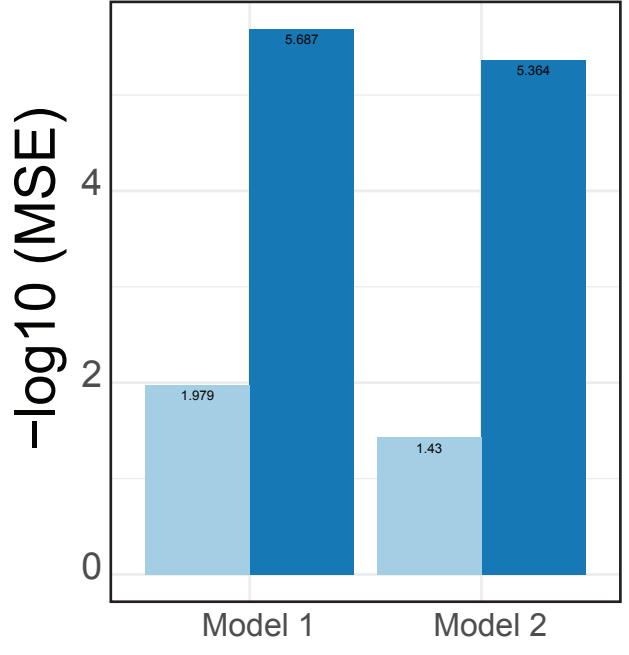

50 iterations for background peaks

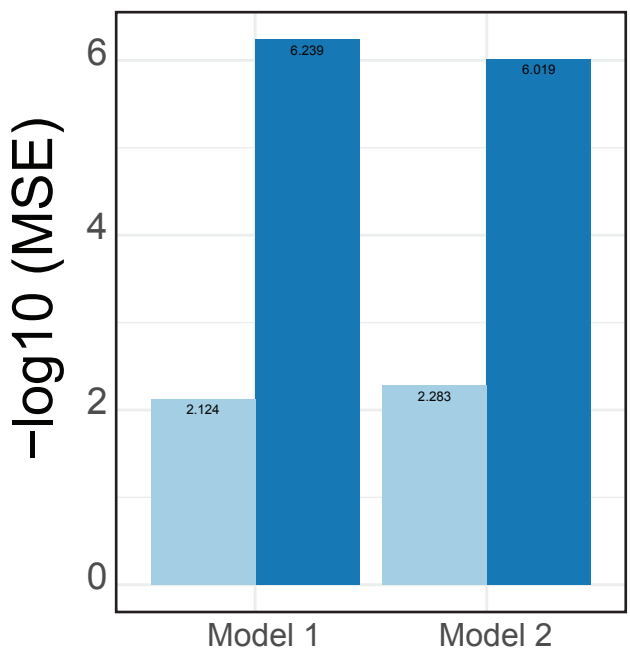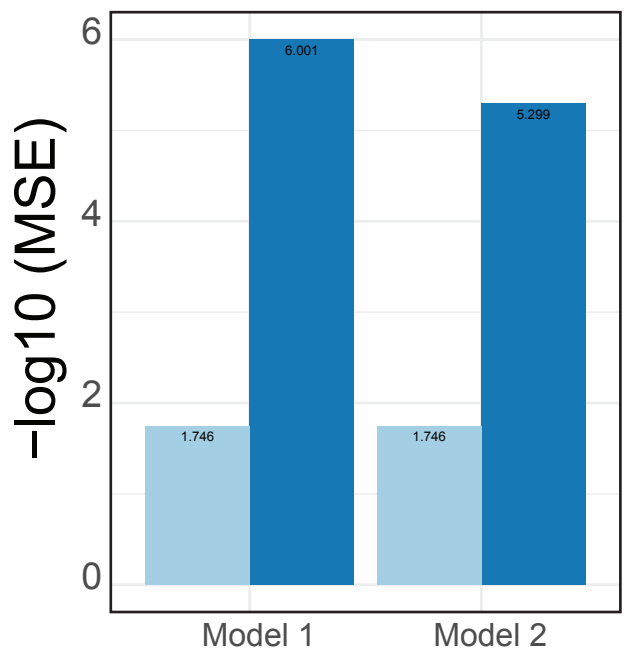

Supplement: Supplementary file [file 12784706]
